# Supplementary material
Source: publisher figshare collection journal article supplement (https://geolsoc.figshare.com/ndownloader/files/28662458)
Supplement: Supplementary file 1 [file 28662458]

| Sr.  No. | Borehole | Box  No. | Depth  (From)  m | Depth  (To)  m | Section | Length  cm | Sample  Designation | Destructive  (Yes or No) | Reason |
| --- | --- | --- | --- | --- | --- | --- | --- | --- | --- |
| 1 | KBH1 | 1 | 0.07 | 0.12 | 1 | 5 | KBH1_226 |  |  |
| 2 |  | 1 | 3.40 | 3.50 | 2 | 10 | KBH1_227 |  |  |
| 3 |  | 1 | 5.27 | 5.31 | 3 | 4 | KBH1_228 |  |  |
| 4 |  | 3 | 11.27 | 11.32 | 3 | 5 | KBH1_229 |  |  |
| 5 |  | 11 | 32.38 | 32.43 | 1 | 5 | KBH1_230 |  |  |
| 6 |  | 13 | 38.14 | 38.19 | 1 | 5 | KBH1_231 |  |  |
| 7 |  | 14 | 41.35 | 41.37 | 1 | 2 | KBH1_232 |  |  |
| 8 |  | 15 | 44.11 | 44.15 | 2 | 4 | KBH1_233 |  |  |
| 9 |  | 22 | 64.47 | 64.49 | 2 | 2 | KBH1_234 |  |  |
| 10 |  | 24 | 69.80 | 69.85 | 1 | 5 | KBH1_235 |  |  |
| 11 |  | 24 | 71.67 | 71.70 | 3 | 3 | KBH1_236 |  |  |
| 12 |  | 27 | 79.04 | 79.06 | 2 | 2 | KBH1_237 |  |  |
| 13 |  | 29 | 85.43 | 85.49 | 2 | 6 | KBH1_238 |  |  |
| 14 |  | 31 | 91.02 | 91.06 | 3 | 4 | KBH1_239 |  |  |
| 15 |  | 33 | 94.90 | 94.95 | 1 | 5 | KBH1_240 |  |  |
| 16 |  | 37 | 110.88 | 110.91 | 3 | 3 | KBH1_241 |  |  |
| 17 |  | 224 | 916.50 | 916.60 | 1 | 10 | KBH1_242 |  |  |
| 18 |  | 222 | 910.15 | 910.20 | 3 | 5 | KBH1_243 |  |  |
| 19 |  | 220 | 900.68 | 900.73 | 4 | 5 | KBH1_244 |  |  |
| 20 |  | 217 | 881.76 | 881.81 | 1 | 5 | KBH1_245 |  |  |
| 21 |  | 214 | 868.77 | 868.82 | 1 | 5 | KBH1_246 |  |  |
| 22 |  | 211 | 853.64 | 853.69 | 1 | 5 | KBH1_247 |  |  |
| 23 |  | 211 | 857.75 | 857.80 | 5 | 5 | KBH1_248 |  |  |
| 24 |  | 208 | 838.97 | 839.03 | 1 | 6 | KBH1_249 |  |  |
| 25 |  | 207 | 834.37 | 834.42 | 1 | 5 | KBH1_250 |  |  |
| 26 |  | 206 | 834.15 | 834.19 | 5 | 4 | KBH1_251 |  |  |
| 27 |  | 204 | 819.87 | 819.91 | 1 | 4 | KBH1_252 |  |  |
| 28 |  | 203 | 819.44 | 819.50 | 5 | 6 | KBH1_253 |  |  |
| 29 |  | 201 | 805.16 | 805.23 | 1 | 7 | KBH1_254 |  |  |
| 30 |  | 194 | 771.72 | 771.77 | 1 | 5 | KBH1_255 |  |  |
| 31 |  | 204 | 822.98 | 823.03 | 5 | Powder | KBH1_256 |  |  |
| 32 |  | 193 | 769.05 | 769.12 | 4 | 7 | KBH1_257 |  |  |
| 33 |  | 191 | 757.06 | 757.12 | 1 | 6 | KBH1_258 |  |  |
| 34 |  | 189 | 747.37 | 747.43 | 1 | 6 | KBH1_259 |  |  |
| 35 |  | 188 | 742.83 | 742.88 | 1 | 5 | KBH1_260 |  |  |
| 36 |  | 188 | 747.33 | 747.38 | 5 | 5 | KBH1_261 |  |  |
| 37 |  | 186 | 734.76 | 734.82 | 2 | 6 | KBH1_262 |  |  |
| 38 |  | 185 | 729.92 | 729.99 | 2 | 7 | KBH1_263 |  |  |
| 39 |  | 184 | 732.38 | 732.44 | 5 | 6 | KBH1_264 |  |  |
| 40 |  | 184 | 727. 24 | 727.31 | 5 | 7 | KBH1_265 |  |  |
| 41 |  | 183 | 718.42 | 718.48 | 1 | 6 | KBH1_266 |  |  |
| Sr.  N0. | Boehole | Box  No. | Depth  (From)  m | Depth  (To)  m | Section | Length  cm | Sample  Designation | Destructive  (Yes or No) | Reason |
| 42 |  | 183 | 721.42 | 721.49 | 4 | 7 | KBH1_267 |  |  |
| 43 |  | 182 | 715.89 | 715.98 | 3 | 9 | KBH1_268 |  |  |
| 44 |  | 182 | 717.98 | 718.04 | 5 | 6 | KBH1_269 |  |  |
| 45 |  | 181 | 708.63 | 708.71 | 1 | 8 | KBH1_270 |  |  |
| 46 |  | 180 | 703.83 | 703.91 | 1 | 8 | KBH1_271 |  |  |
| 47 |  | 174 | 765.12 | 765.19 | 1 | 7 | KBH1_272 |  |  |
| 48 |  | 173 | 670.15 | 670.22 | 1 | 7 | KBH1_273 |  |  |
| 49 |  | 170 | 655.42 | 655.49 | 1 | 7 | KBH1_274 |  |  |
| 50 |  | 167 | 643.98 | 644.07 | 4 | 9 | KBH1_275 |  |  |
| 51 |  | 163 | 624.74 | 624.81 | 4 | 7 | KBH1_276 |  |  |
| 52 |  | 162 | 621.52 | 621.58 | 4 | 6 | KBH1_277 |  |  |
| 53 |  | 162 | 621.59 | 621.63 | 4 | 4 | KBH1_278 |  |  |
| 54 |  | 155 | 584.45 | 584.54 | 1 | 9 | KBH1_279 |  |  |
| 55 |  | 151 | 566.61 | 566.69 | 3 | 8 | KBH1_280 |  |  |
| 56 |  | 148 | 551.74 | 551.86 | 3 | 12 | KBH1_281 |  |  |
| 57 |  | 147 | 545.79 | 545.88 | 2 | 9 | KBH1_282 |  |  |
| 58 |  | 145 | 536.61 | 536.69 | 2 | 8 | KBH1_283 |  |  |
| 59 |  | 140 | 510.88 | 510.98 | 1 | 10 | KBH1_284 |  |  |
| 60 |  | 138 | 502.08 | 502.15 | 2 | 7 | KBH1_285 |  |  |
| 61 |  | 135 | 492.62 | 492.68 | 3 | 6 | KBH1_286 |  |  |
| 62 |  | 132 | 480.71 | 480.77 | 2 | 6 | KBH1_287 |  |  |
| 63 |  | 131 | 479.22 | 479.26 | 4 | 4 | KBH1_288 |  |  |
| 64 |  | 130 | 475.14 | 475.20 | 4 | 6 | KBH1_289 |  |  |
| 65 |  | 129 | 469.58 | 469.64 | 2 | 6 | KBH1_290 |  |  |
| 66 |  | 128 | 464.77 | 464.84 | 2 | 7 | KBH1_291 |  |  |
| 67 |  | 127 | 462.74 | 462.79 | 3 | 5 | KBH1_292 |  |  |
| 68 |  | 123 | 446.24 | 446.29 | 3 | 5 | KBH1_293 |  |  |
| 69 |  | 122 | 444.15 | 444.20 | 4 | 5 | KBH1_294 |  |  |
| 70 |  | 126 | 456.91 | 456.96 | 1 | 5 | KBH1_295 |  |  |
| 71 |  | 125 | 452.57 | 452.61 | 1 | 4 | KBH1_296 |  |  |
| 72 |  | 122 | 440.59 | 440.66 | 1 | 7 | KBH1_297 |  |  |
| 73 |  | 118 | 425.85 | 425.88 | 1 | 3 | KBH1_298 |  |  |
| 74 |  | 117 | 421.83 | 421.87 | 1 | 4 | KBH1_299 |  |  |
| 75 |  | 114 | 413.33 | 413.39 | 4 | 6 | KBH1_300 |  |  |
| 76 |  | 113 | 407.71 | 407.76 | 2 | 5 | KBH1_301 |  |  |
| 77 |  | 110 | 397.50 | 397.55 | 4 | 5 | KBH1_302 |  |  |
| 78 |  | 99 | 353.55 | 353.61 | 3 | 6 | KBH1_303 |  |  |
| 79 |  | 98 | 349.94 | 350.000 | 3 | 6 | KBH1_304 |  |  |
| 80 |  | 98 | 351.40 | 351.47 | 4 | 7 | KBH1_305 |  |  |
| 81 |  | 97 | 347.06 | 347.10 | 4 | 4 | KBH1_306 |  |  |
| 82 |  | 96 | 340.18 | 340.25 | 1 | Powder | KBH1_307 |  |  |
| 83 |  | 96 | 343.74 | 343.80 | 4 | 6 | KBH1_308 |  |  |
| 84 |  | 95 | 339.37 | 339.41 | 4 | 4 | KBH1_309 |  |  |
| Sr.  N0. | Boehole | Box  No. | Depth  (From)  m | Depth  (To)  m | Section | Length  cm | Sample  Designation | Destructive  (Yes or No) | Reason |
| 85 |  | 95 | 338.95 | 339.0 | 3 | 5 | KBH1_310 |  |  |
| 86 |  | 93 | 330.70 | 330.77 | 2 | 7 | KBH1_311 |  |  |
| 87 |  | 105 | 375.54 | 375.60 | 3 | 6 | KBH1_312 |  |  |
| 88 |  | 107 | 384.92 | 384.97 | 3 | 5 | KBH1_313 |  |  |
| 89 |  | 103 | 367.88 | 367.93 | 1 | 5 | KBH1_314 |  |  |
| 90 |  | 89 | 316.94 | 317.00 | 4 | 6 | KBH1_315 |  |  |
| 91 |  | 88 | 310.87 | 310.92 | 3 | Powder | KBH1_316 |  |  |
| 92 |  | 86 | 306.30 | 306.36 | 4 | 6 | KBH1_317 |  |  |
| 93 |  | 80 | 279.39 | 279.43 | 1 | 4 | KBH1_318 |  |  |
| 94 |  | 76 | 266.07 | 266.14 | 3 | 7 | KBH1_319 |  |  |
| 95 |  | 72 | 250.36 | 250.42 | 2 | 6 | KBH1_320 |  |  |
| 96 |  | 69 | 240.38 | 240.45 | 4 | 7 | KBH1_321 |  |  |
| 97 |  | 65 | 221.30 | 221.37 | 1 | 7 | KBH1_322 |  |  |
| 98 |  | 65 | 223.18 | 223.24 | 3 | Powder | KBH1_323 |  |  |
| 99 |  | 60 | 204.29 | 204.36 | 3 | 7 | KBH1_324 |  |  |
| 100 |  | 48 | 157.83 | 157.89 | 1 | 6 | KBH1_325 |  |  |
| 101 |  | 41 | 127.49 | 127.55 | 2 | 6 | KBH1_326 |  |  |
| 102 |  | 39 | 116.83 | 116.90 | 1 | 7 | KBH1_327 |  |  |
| 103 |  | 38 | 112.50 | 112.55 | 1 | Powder | KBH1_328 |  |  |
| 104 |  | 51 | 171.94 | 172.01 | 3 | 7 | KBH1_329 |  |  |
|  |  |  |  |  |  |  |  |  |  |
|  |  |  |  |  |  |  |  |  |  |
|  |  |  |  |  |  |  |  |  |  |
|  |  |  |  |  |  |  |  |  |  |
|  |  |  |  |  |  |  |  |  |  |
|  |  |  |  |  |  |  |  |  |  |
|  |  |  |  |  |  |  |  |  |  |
|  |  |  |  |  |  |  |  |  |  |
|  |  |  |  |  |  |  |  |  |  |
|  |  |  |  |  |  |  |  |  |  |
|  |  |  |  |  |  |  |  |  |  |
|  |  |  |  |  |  |  |  |  |  |
|  |  |  |  |  |  |  |  |  |  |
